# Supplementary material for: Global trends in clinical trials involving pluripotent stem cells: a systematic multi-database analysis
Source: PubMed Central journal article supplement (PMC7486930; doi:10.1038/s41536-020-00100-4), 2020-09-11
Supplement: 41536_2020_100_MOESM1_ESM.pdf [file 41536_2020_100_MOESM1_ESM.pdf]

# Supplementary Material

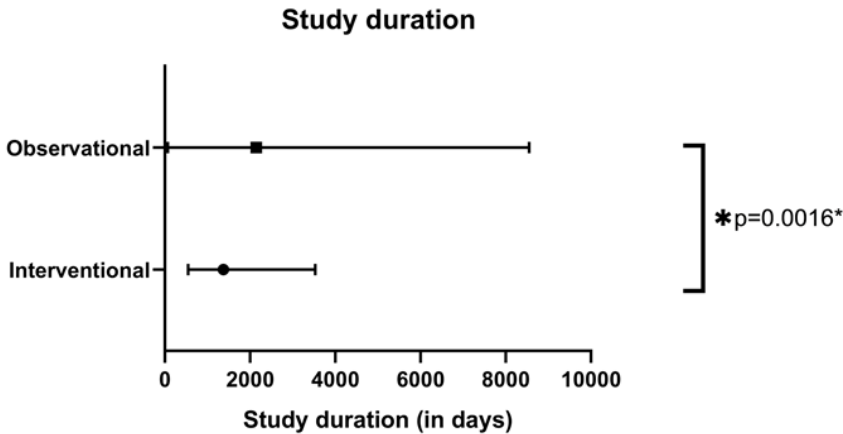

| Study group        | Interventional trials | Observational trials |
|--------------------|-----------------------|----------------------|
| Number of values   | 26                    | 80                   |
| Mean               | 1373.5                | 2147.3               |
| Std. Deviation     | 650.8                 | 1890.9               |
| Std. Error of Mean | 127.6                 | 202.3                |

\*unpaired, two-tailed t-test

**Supplementary Figure 1. Statistical analysis of the study duration of observational versus interventional studies.**

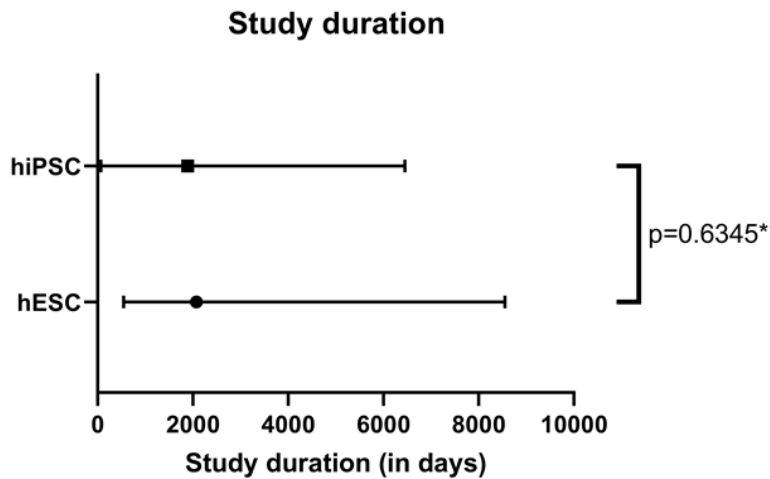

| Study group        | hESC   | hiPSC  |
|--------------------|--------|--------|
| Number of values   | 30     | 79     |
| Mean               | 2073.1 | 1889.5 |
| Std. Deviation     | 1882.5 | 1515.0 |
| Std. Error of Mean | 343.7  | 170.5  |

\*unpaired, two-tailed t-test

**Supplementary Figure 2. Statistical analysis of the study duration of clinical trials involving hiPSCs versus hESCs.**

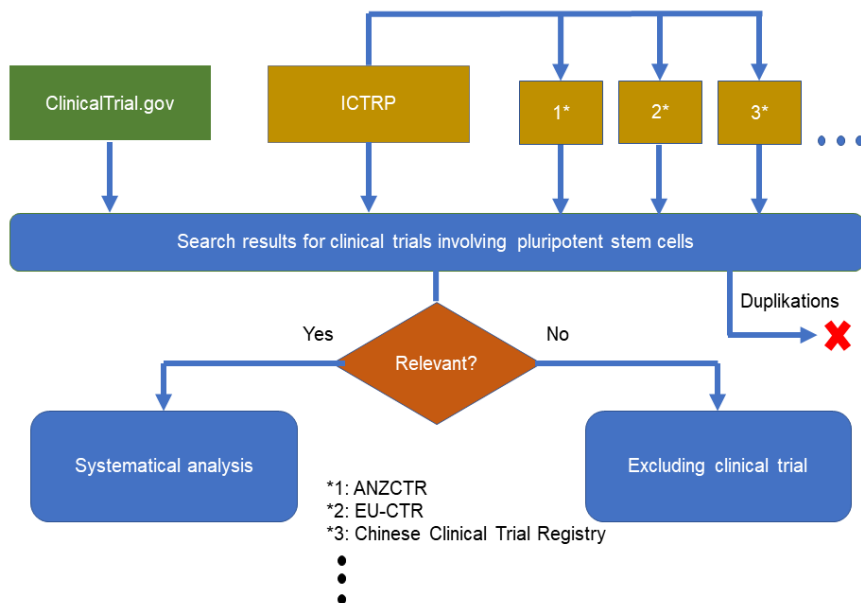

**Supplementary Figure 3. Algorithm for systematic multi-database search on clinical trials involving pluripotent stem cells.**

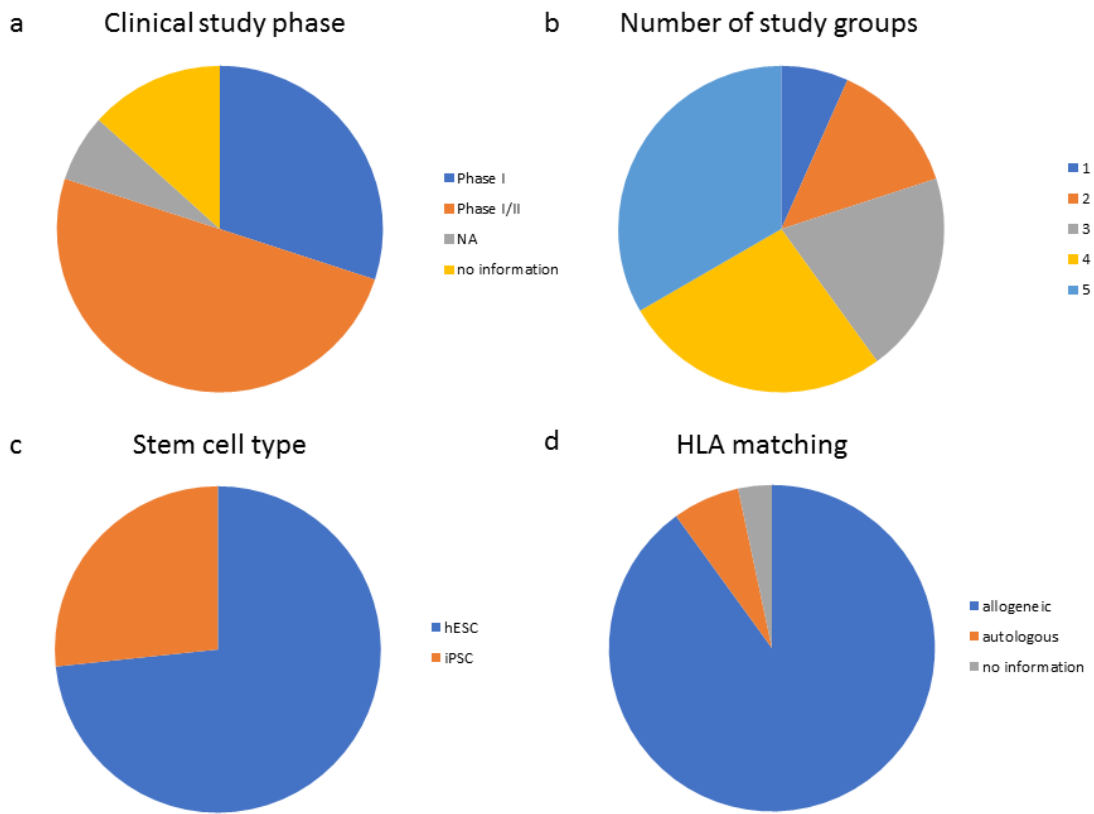

**Supplementary Figure 4. Characteristics of interventional studies**

| <b>Number</b> | <b>Database</b>    | <b>Study title</b>                                                                                                                                              | <b>NCT number or ID number</b> |
|---------------|--------------------|-----------------------------------------------------------------------------------------------------------------------------------------------------------------|--------------------------------|
| 1             | ClinicalTrials.gov | Induced Pluripotent Stem Cells for Niemann Pick Disease                                                                                                         | NCT03883750                    |
| 2             | ClinicalTrials.gov | Organoids Derived From Induced-Pluripotent Stem Cells (iPS) From Patients With High Grade Astrocytoma (GLIOMANOID)                                              | NCT03971812                    |
| 3             | ClinicalTrials.gov | Modeling and Pharmacological Targeting of Genetic Cardiomyopathy in Children Via Cardiomyocytes Derived From Induced Pluripotent Stem Cells (DMDstem) (DMDstem) | NCT03696628                    |
| 4             | ClinicalTrials.gov | Human iPSC for Repair of Vasodegenerative Vessels in Diabetic Retinopathy (iPSC)                                                                                | NCT03403699                    |
| 5             | ClinicalTrials.gov | Establishment of Human Cellular Disease Models for Morquio Disease (IPSMORQUIO)                                                                                 | NCT03872713                    |
| 6             | ClinicalTrials.gov | Establishment of Human Cellular Disease Models for Wilson Disease (IPSWILSON)                                                                                   | NCT03867526                    |
| 7             | ClinicalTrials.gov | Generation of Marfan Syndrome and Fontan Cardiovascular Models Using Patient-specific Induced Pluripotent Stem Cells                                            | NCT02815072                    |
| 8             | ClinicalTrials.gov | ASD-specific Induced Pluripotent Stem Cells for Disease Modeling                                                                                                | NCT02720939                    |
| 9             | ClinicalTrials.gov | Treating Heart Failure With hPSC-CMs (HEAL-CHF)                                                                                                                 | NCT03763136                    |
| 10            | ClinicalTrials.gov | Investigating Cardiovascular Adverse Events Related to Cancer Treatment (InvestiCAT)                                                                            | NCT03199300                    |
| 11            | ClinicalTrials.gov | Multi-Omics and iPSCs to Improve Diagnosis of Rare Intellectual Disabilities (MIDRID)                                                                           | NCT03635294                    |
| 12            | ClinicalTrials.gov | Modeling Bronchial Epithelium Modifications Associated With COPD Using iPS (INVECCO)                                                                            | NCT03181204                    |
| 13            | ClinicalTrials.gov | Thalassemia Treatment Based on the Stem Cell Technology                                                                                                         | NCT03222453                    |
| 14            | ClinicalTrials.gov | Stem Cells in NF1 Patients With Tumors of the Central Nervous System                                                                                            | NCT03332030                    |
| 15            | ClinicalTrials.gov | Biomolecular Messages Associated With the Differentiation of Human Induced Pluripotent Stem Cells to Skeletal Muscle Progenitor Cells                           | NCT02836145                    |
| 16            | ClinicalTrials.gov | Derivation of Induced Pluripotent Stem Cells From an Existing Collection of Human Somatic Cells                                                                 | NCT00801333                    |

|    |                    |                                                                                                                                                                  |             |
|----|--------------------|------------------------------------------------------------------------------------------------------------------------------------------------------------------|-------------|
| 17 | ClinicalTrials.gov | Use of Existing Fibroblast Cells to Convert to Induced Pluripotent Stem Cells                                                                                    | NCT00801372 |
| 18 | ClinicalTrials.gov | Production of iPSC Derived RPE Cells for Transplantation in AMD                                                                                                  | NCT02464956 |
| 19 | ClinicalTrials.gov | Regenerative Cellular Therapies, Physiology, Pathology and Developmental Biology (RCT)                                                                           | NCT02469207 |
| 20 | ClinicalTrials.gov | Development of iPS From Donated Somatic Cells of Patients With Neurological Diseases                                                                             | NCT00874783 |
| 21 | ClinicalTrials.gov | iPSC Neurons From Adult Survivors of Childhood Cancer Who Have Persistent Vincristine-Induced Neuropathy                                                         | NCT02564484 |
| 22 | ClinicalTrials.gov | Generation of Haploid Stem Cells From Human Germ Cells                                                                                                           | NCT01454765 |
| 23 | ClinicalTrials.gov | Generation of Heart Muscle Cells From Blood or Skin Cells of Breast Cancer Patients                                                                              | NCT02772367 |
| 24 | ClinicalTrials.gov | iPS Cells of Patients for Models of Retinal Dystrophies (RETIPS)                                                                                                 | NCT03853252 |
| 25 | ClinicalTrials.gov | Symdeko in Cystic Fibrosis Patients                                                                                                                              | NCT03506061 |
| 26 | ClinicalTrials.gov | Treatment of Dry Age Related Macular Degeneration Disease With Retinal Pigment Epithelium Derived From Human Embryonic Stem Cells                                | NCT03046407 |
| 27 | ClinicalTrials.gov | Safety and Efficacy of Subretinal Transplantation of Clinical Human Embryonic Stem Cell Derived Retinal Pigment Epitheliums in Treatment of Retinitis Pigmentosa | NCT03944239 |
| 28 | ClinicalTrials.gov | A Study to Evaluate Transplantation of Astrocytes Derived From Human Embryonic Stem Cells, in Patients With Amyotrophic Lateral Sclerosis (ALS)                  | NCT03482050 |
| 29 | ClinicalTrials.gov | Susceptibility Genes in Autism Spectrum Disorders                                                                                                                | NCT02628808 |
| 30 | ClinicalTrials.gov | The Derivation of Human Embryonic Stem Cell Lines From PGD Embryos                                                                                               | NCT00353210 |
| 31 | ClinicalTrials.gov | Subretinal Transplantation of Retinal Pigment Epitheliums in Treatment of Age-related Macular Degeneration Diseases                                              | NCT02755428 |
| 32 | ClinicalTrials.gov | Derivation of New Human Embryonic Stem Cell Lines Lines for Clinical Use                                                                                         | NCT00353197 |
| 33 | ClinicalTrials.gov | Biological Collection of Kidney Cells (CRHiPS)                                                                                                                   | NCT03364504 |
| 34 | ClinicalTrials.gov | Cell Collection to Study Eye Diseases                                                                                                                            | NCT01432847 |

|    |                    |                                                                                                                                                                                                                                                                                            |             |
|----|--------------------|--------------------------------------------------------------------------------------------------------------------------------------------------------------------------------------------------------------------------------------------------------------------------------------------|-------------|
| 35 | ClinicalTrials.gov | Generation of a Cellular Model of CADASIL From Skin Fibroblasts                                                                                                                                                                                                                            | NCT02032225 |
| 36 | ClinicalTrials.gov | Derivation of New Human Embryonic Stem Cell Lines: Identification of Instructive Factors for Germ Cells Development                                                                                                                                                                        | NCT01165918 |
| 37 | ClinicalTrials.gov | A Phase I/IIa, Open-Label, Single-Center, Prospective Study to Determine the Safety and Tolerability of Sub-retinal Transplantation of Human Embryonic Stem Cell Derived Retinal Pigmented Epithelial(MA09-hRPE) Cells in Patients With Advanced Dry Age-related Macular Degeneration(AMD) | NCT01674829 |
| 38 | ClinicalTrials.gov | Stem Cell Therapy for Outer Retinal Degenerations                                                                                                                                                                                                                                          | NCT02903576 |
| 39 | ClinicalTrials.gov | CIQTP Prolongation : Role and Mechanism in Sudden Cardiac Death (IQARE-SCD)                                                                                                                                                                                                                | NCT03387072 |
| 40 | ClinicalTrials.gov | Establishment of Genetic Basis for Neurological Disease by Genetic Screening                                                                                                                                                                                                               | NCT03322306 |
| 41 | ClinicalTrials.gov | Malignant Hyperthermia Registry and Genetic Testing                                                                                                                                                                                                                                        | NCT02964481 |
| 42 | ClinicalTrials.gov | Safety and Efficacy Study of Human ESC-derived Neural Precursor Cells in the Treatment of Parkinson's Disease                                                                                                                                                                              | NCT03119636 |
| 43 | ClinicalTrials.gov | BAP-EB as a Predictive Tool for Endometrial Receptivity and Pregnancy Outcome of IVF Treatment                                                                                                                                                                                             | NCT02713854 |
| 44 | ClinicalTrials.gov | UTHealth Turner Syndrome Research Registry                                                                                                                                                                                                                                                 | NCT03185702 |
| 45 | ClinicalTrials.gov | The Crnic Institute Human Trisome Project Biobank (HTP)                                                                                                                                                                                                                                    | NCT02864108 |
| 46 | ClinicalTrials.gov | Safety and Efficacy Study of OpRegen for Treatment of Advanced Dry-Form Age-Related Macular Degeneration                                                                                                                                                                                   | NCT02286089 |
| 47 | ClinicalTrials.gov | Safety and Tolerability of MA09-hRPE Cells in Patients With Stargardt's Macular Dystrophy(SMD)                                                                                                                                                                                             | NCT01625559 |
| 48 | ClinicalTrials.gov | Ability of a Molecule (Prima) to Restore Physiological Differentiation in Epithelium Expressing Gene p63 (PRIMAculture)                                                                                                                                                                    | NCT02896387 |
| 49 | ClinicalTrials.gov | Mesenchymal Stem Cells (MSCs) - Like Cell Transplantation in Women With Primary Ovarian Insufficiency (MSCLCTWPOI)                                                                                                                                                                         | NCT03877471 |
| 50 | ClinicalTrials.gov | Latent Structure of Multi-level Assessments and Predictors of                                                                                                                                                                                                                              | NCT02450240 |

|    |                    |                                                                                                                                          |             |
|----|--------------------|------------------------------------------------------------------------------------------------------------------------------------------|-------------|
|    |                    | Outcomes in Psychiatric Disorders                                                                                                        |             |
| 51 | ClinicalTrials.gov | The Role of TBX3 in Human ES Cell Differentiation                                                                                        | NCT00581152 |
| 52 | ClinicalTrials.gov | Early MRI Detection of Myocardial Deterioration as a Preventive, Disease Staging, and Prognostic Biomarker in Insulin Resistance         | NCT03509441 |
| 53 | ClinicalTrials.gov | Heart and Muscle Metabolism in Barth Syndrome                                                                                            | NCT01625663 |
| 54 | ClinicalTrials.gov | Alpha-1 Antitrypsin Deficiency Adult Liver Study                                                                                         | NCT02014415 |
| 55 | ClinicalTrials.gov | FT500 as Monotherapy and in Combination With Immune Checkpoint Inhibitors in Subjects With Advanced Solid Tumors                         | NCT03841110 |
| 56 | ClinicalTrials.gov | Differences in Peritoneal Stem Cells in Women With and Without Adhesions After Gynaecological Surgery                                    | NCT02847676 |
| 57 | ClinicalTrials.gov | Genetic and Environmental Determinants That Control Metabolism in Pulmonary Hypertension                                                 | NCT02594917 |
| 58 | ClinicalTrials.gov | Whole Transcriptome Profiling and Metabolic Phenotyping in Children With ROHHAD Syndrome                                                 | NCT02602769 |
| 59 | ClinicalTrials.gov | Rare CFTR Mutation Cell Collection Protocol (RARE) (RARE)                                                                                | NCT03161808 |
| 60 | ClinicalTrials.gov | In Vitro Model of the Cystic Fibrosis Bronchial Epithelium Via iPSC Technology (PaCyFIC)                                                 | NCT03754088 |
| 61 | ClinicalTrials.gov | Developing Protocols for Modelling of Genetic Diseases Using Induced Pluripotent Stem Cells                                              | NCT03612310 |
| 62 | ClinicalTrials.gov | Generation of Cancer Antigen-Specific T-cells From Human Induced Pluripotent Stem Cells (iPSC) for Research and Potential Future Therapy | NCT03407040 |
| 63 | ClinicalTrials.gov | Development of the Tool " iPSC " for the Functional Study of Mutations Responsible for Mental Retardation (Rementips)                    | NCT02980302 |
| 64 | ClinicalTrials.gov | Feasibility of Generating Pluripotent Stem Cells From Patients With Familial Retinoblastoma                                              | NCT02193724 |
| 65 | ClinicalTrials.gov | Pharmacogenomic Evaluation of Antihypertensive Responses in Induced Pluripotent Stem (iPS) Cells Study (PEAR-iPSC)                       | NCT01943383 |
| 66 | ClinicalTrials.gov | Cell-Based Approaches For Modeling and Treating Ataxia-Telangiectasia                                                                    | NCT02246491 |
| 67 | ClinicalTrials.gov | Induction of Pluripotent Stem Cells                                                                                                      | NCT02084407 |

|    |                    |                                                                                                                                                                  |             |
|----|--------------------|------------------------------------------------------------------------------------------------------------------------------------------------------------------|-------------|
|    |                    | From Human Fibroblasts of DM1 Patients                                                                                                                           |             |
| 68 | ClinicalTrials.gov | Derivation of Human Induced Pluripotent Stem (iPS) Cells to Heritable Cardiac Arrhythmias                                                                        | NCT02413450 |
| 69 | ClinicalTrials.gov | Evaluating Cardiovascular Phenotypes Using Induced Pluripotent Stem Cells (iPSC)                                                                                 | NCT01517425 |
| 70 | ClinicalTrials.gov | Stem Cell Study of Genetics and Drug Addiction                                                                                                                   | NCT01534624 |
| 71 | ClinicalTrials.gov | Molecular Mechanism Identification in Inherited Arrhythmias and Valvulopathies From Induced Pluripotent Stem Cells (Diag-iPS)                                    | NCT01734356 |
| 72 | ClinicalTrials.gov | Transplantation of Human Embryonic Stem Cell-derived Progenitors in Severe Heart Failure (ESCORT)                                                                | NCT02057900 |
| 73 | ClinicalTrials.gov | Generation of Powerful Biological Tools for Understanding the Pathophysiology of Chronic Granulomatous Disease. (FIBRO CGD)                                      | NCT02926963 |
| 74 | ClinicalTrials.gov | Stem Cell Models of Best Disease and Other Retinal Degenerative Diseases.                                                                                        | NCT02162953 |
| 75 | ClinicalTrials.gov | Individualized Early Risk Assessment for Heart Diseases (IndivuHeart)                                                                                            | NCT02417311 |
| 76 | ClinicalTrials.gov | Skin and Blood Research Samples From Healthy Volunteers and Patients With Hematologic Diseases                                                                   | NCT00840567 |
| 77 | ClinicalTrials.gov | Answer ALS: Individualized Initiative for ALS Discovery (AnswerALS)                                                                                              | NCT02574390 |
| 78 | ClinicalTrials.gov | A Safety Surveillance Study in Subjects With Macular Degenerative Disease Treated With Human Embryonic Stem Cell-derived Retinal Pigment Epithelial Cell Therapy | NCT03167203 |
| 79 | ClinicalTrials.gov | CAUSE Trial: Patient Specific-Cellular Characterization of Fibromuscular Dysplasia and High-Risk Atherosclerotic Endothelium                                     | NCT01808729 |
| 80 | ClinicalTrials.gov | Patient Specific Induced Pluripotency Stem Cells (PSiPS)                                                                                                         | NCT00953693 |
| 81 | ClinicalTrials.gov | Translational Approaches to Septic Cardiomyopathy (TASC01)                                                                                                       | NCT03252613 |
| 82 | ClinicalTrials.gov | Generation of Induced Pluripotent Stem (iPS) Cell Lines From Skin Fibroblast Cells of Participants With Age-Related Macular Degeneration                         | NCT03372746 |
| 83 | ClinicalTrials.gov | A Phase I Study of iPS Cell Generation From Patients With COPD                                                                                                   | NCT01860898 |



|    |                    |                                                                                                                                                                                                                                   |             |
|----|--------------------|-----------------------------------------------------------------------------------------------------------------------------------------------------------------------------------------------------------------------------------|-------------|
| 84 | ClinicalTrials.gov | Creation of a Bank of Fibroblast From Patients With Amyotrophic Lateral Sclerosis: Pilot Study (ALSCELL)                                                                                                                          | NCT01639391 |
| 85 | ClinicalTrials.gov | Establishing Fibroblast-Derived Cell Lines From Skin Biopsies of Patients With Immunodeficiency or Immunodysregulation Disorders                                                                                                  | NCT00895271 |
| 86 | ClinicalTrials.gov | Investigating Hereditary Cardiac Disease by Reprogramming Skin Cells to Heart Muscle (CLUE)                                                                                                                                       | NCT01865981 |
| 87 | ClinicalTrials.gov | Study of Subretinal Implantation of Human Embryonic Stem Cell-Derived RPE Cells in Advanced Dry AMD                                                                                                                               | NCT02590692 |
| 88 | ClinicalTrials.gov | Study of Neurodegenerative Diseases Induced Stem Cells in Patients and Healthy Family Controls. (NeuronsiPS)                                                                                                                      | NCT03682458 |
| 89 | ClinicalTrials.gov | Pathology of Helicases and Premature Aging: Study by Derivation of hiPS (HeliPS)                                                                                                                                                  | NCT03898817 |
| 90 | ClinicalTrials.gov | Interventional Study of Implantation of hESC-derived RPE in Patients With RP Due to Monogenic Mutation                                                                                                                            | NCT03963154 |
| 91 | ClinicalTrials.gov | A Follow up Study to Determine the Safety and Tolerability of Sub-retinal Transplantation of Human Embryonic Stem Cell Derived Retinal Pigmented Epithelial (hESC-RPE) Cells in Patients With Stargardt's Macular Dystrophy (SMD) | NCT02941991 |
| 92 | ClinicalTrials.gov | Metformin as a Chemoprevention Agent in Non-small Cell Lung Cancer                                                                                                                                                                | NCT01717482 |
| 93 | ClinicalTrials.gov | The Safety and Tolerability of Sub-retinal Transplantation of SCNT-hES-RPE Cells in Patients With Advanced Dry AMD                                                                                                                | NCT03305029 |
| 94 | ClinicalTrials.gov | Safety and Tolerability of Sub-retinal Transplantation of Human Embryonic Stem Cell Derived Retinal Pigmented Epithelial (hESC-RPE) Cells in Patients With Stargardt's Macular Dystrophy (SMD)                                    | NCT01469832 |
| 95 | ClinicalTrials.gov | Modeling the Neurological Basis and Characterizing the Neurological Phenotype of Obesity Using Human Neural Stem Cells                                                                                                            | NCT03263390 |
| 96 | ClinicalTrials.gov | Target Validation and Discovery in Idiopathic Bronchiectasis                                                                                                                                                                      | NCT03750734 |
| 97 | ClinicalTrials.gov | Safety Observation on hESC Derived MSC Like Cell for the Meniscus Injury                                                                                                                                                          | NCT03839238 |
| 98 | ClinicalTrials.gov | A Study of CYP-001 for the Treatment of Steroid-Resistant Acute Graft                                                                                                                                                             | NCT02923375 |

|     |                    | Versus Host Disease                                                                                                                                                   |                    |
|-----|--------------------|-----------------------------------------------------------------------------------------------------------------------------------------------------------------------|--------------------|
| 99  | ClinicalTrials.gov | Sub-retinal Transplantation of hESC Derived RPE(MA09-hRPE)Cells in Patients With Stargardt's Macular Dystrophy                                                        | NCT01345006        |
| 100 | ClinicalTrials.gov | Safety and Tolerability of Sub-retinal Transplantation of hESC Derived RPE (MA09-hRPE) Cells in Patients With Advanced Dry Age Related Macular Degeneration (Dry AMD) | NCT01344993        |
| 101 | ClinicalTrials.gov | Long Term Follow Up of Sub-retinal Transplantation of hESC Derived RPE Cells in Stargardt Macular Dystrophy Patients                                                  | NCT02445612        |
| 102 | ClinicalTrials.gov | Long Term Follow Up of Sub-retinal Transplantation of hESC Derived RPE Cells in Patients With AMD                                                                     | NCT02463344        |
| 103 | ClinicalTrials.gov | A Study Of Implantation Of Retinal Pigment Epithelium In Subjects With Acute Wet Age Related Macular Degeneration                                                     | NCT01691261        |
| 104 | ClinicalTrials.gov | Retinal Pigment Epithelium Safety Study For Patients In B4711001                                                                                                      | NCT03102138        |
| 105 | ClinicalTrials.gov | Biomarkers for Pain in Spinal Cord Injury (SCI) Patients (SCI Pain)                                                                                                   | NCT00913471        |
| 106 | ClinicalTrials.gov | Assessment of Paclitaxel-Induced Neuropathy                                                                                                                           | NCT01953159        |
| 107 | ClinicalTrials.gov | Understanding Clinical Phenotype and Collecting Biomarker Samples in C9ORF72 ALS                                                                                      | NCT02686268        |
| 108 | ClinicalTrials.gov | Clinical Study of Subretinal Transplantation of Human Embryo Stem Cell Derived Retinal Pigment Epitheliums in Treatment of Macular Degeneration Diseases              | NCT02749734        |
| 109 | ClinicalTrials.gov | Studies of Autistic Patients: Gene Networks and Clinical Subtypes                                                                                                     | NCT01092208        |
| 110 | ICTRP              | MSC-like cell therapy for primary ovarian insufficiency                                                                                                               | ChiCTR1900021921   |
| 111 | ICTRP              | Kyoto Trial to Evaluate the Safety and Efficacy of iPSC-derived dopaminergic progenitors in the treatment of Parkinson's Disease                                      | JPRN-UMIN000033564 |
| 112 | ICTRP              | Kyoto Trial to Evaluate the Safety and Efficacy of Tacrolimus in the iPSC-based Therapy for Parkinson's Disease                                                       | JPRN-UMIN000033565 |
| 113 | ICTRP              | Clinical trial of human (allogeneic) induced pluripotent stem cell-derived cardiomyocyte sheet for severe                                                             | JPRN-UMIN000032989 |

|     |       |                                                                                                                                                                                                                                                    |                     |
|-----|-------|----------------------------------------------------------------------------------------------------------------------------------------------------------------------------------------------------------------------------------------------------|---------------------|
|     |       | cardiomyopathy                                                                                                                                                                                                                                     |                     |
| 114 | ICTRP | Understanding of vitiligo (skin disease).                                                                                                                                                                                                          | CTRI/2018/04/013393 |
| 115 | ICTRP | Individualized induced pluripotent stem cells from the fibroblasts of patients' lesions with different skin diseases                                                                                                                               | ChiCTR-BOC-17011649 |
| 116 | ICTRP | A Study of transplantation of allogenic induced pluripotent stem cell (iPSC) derived retinal pigment epithelium (RPE) cell suspension in subjects with neovascular age related macular degeneration                                                | JPRN-UMIN000026003  |
| 117 | ICTRP | Generation of induced pluripotent stem cells (iPSCs) derived from intractable retinal disease patients and clarification of the diseases and novel therapies development by using retinal tissues differentiated and induced from iPSC.            | JPRN-UMIN000021556  |
| 118 | ICTRP | Investigation of the underlying pathomechanisms found in defects of the neurotransmitter, Pterine -, phenyl alanine, and 5-Methyltetrahydrofolate metabolism in induced pluripotent stem cells (iPSC) and derivatives                              | DRKS00010150        |
| 119 | ICTRP | Basic research of immunotherapy using dendritic cells derived from induced pluripotent stem cells in healthy donors and cancer patients                                                                                                            | JPRN-UMIN000021105  |
| 120 | ICTRP | Establishment and analyses of induced pluripotent stem (iPS) cells / human-induced neuronal (hiN) cells / induced microglia-like (iMG) cells from tissue, to elucidate the pathogenesis and pathophysiology of mental and developmental disorders. | JPRN-UMIN000020468  |
| 121 | ICTRP | Generation of induced pluripotent stem cells from somatic cells of healthy individuals and patients with inherited heart diseases                                                                                                                  | DRKS00009433        |
| 122 | ICTRP | Clinical study of subretinal transplantation of clinical human embryonic stem cells derived retinal pigment epitheliums in treatment of dry age-related macular degeneration diseases                                                              | ChiCTR-OCB-15007054 |
| 123 | ICTRP | Analysis of diseases in otorhinolaryngology using iPS cells                                                                                                                                                                                        | JPRN-UMIN000018051  |
| 124 | ICTRP | Next Generation Sequencing and Induced Pluripotent Stem Cell Applications in Genetic and Inheritable                                                                                                                                               | ACTRN12615000140550 |

|     |       | Forms of Renal Disease                                                                                                                                                                                            |                     |
|-----|-------|-------------------------------------------------------------------------------------------------------------------------------------------------------------------------------------------------------------------|---------------------|
| 125 | ICTRP | Induced pluripotent stem cell (iPSC)-derived immortalized megakaryocyte cell lines (imMKCLs) from voluntary blood component donors with specific HLA haplotypes towards platelet products in transfusion therapy. | JPRN-UMIN000015345  |
| 126 | ICTRP | The clinical trial of human embryonic stem cell derived epithelial cells transplantation in the treatment of severe ocular surface diseases                                                                       | ChiCTR-OCB-15005968 |
| 127 | ICTRP | A Study of transplantation of autologous induced pluripotent stem cell (iPSC) derived retinal pigment epithelium (RPE) cell sheet in subjects with exudative age related macular degeneration                     | JPRN-UMIN000011929  |
| 128 | ICTRP | Development of human cellular models for motor neuron diseases using disease-specific induced pluripotent stem (iPS) cells                                                                                        | JPRN-UMIN000011542  |
| 129 | ICTRP | Development of induced pluripotent stem (iPS) cells from patients with muscular disorders for the study of the pathogenesis of the diseases and development of therapies                                          | JPRN-UMIN000008958  |
| 130 | ICTRP | Plasticity in prefrontal cortical regions in humans: genetic variation, cellular mechanisms and modulation by means of neurofeedback                                                                              | DRKS00004252        |
| 131 | ACTRN | The Western Australia Retinal Degeneration Study: An natural history observational cohort study of retinal degenerations and in vitro retinal disease modelling using patient derived stem cells                  | ACTRN12618000738224 |

**Supplementary Table 1. List of all studies involving pluripotent stem cells**

| ID number   | Title                                                                                                                                                                                                                                                                                 | Cell type                          | Origin     | Target disease                                                                                      | Organ                   | Country or Area | Study design | Study phase | No. patients enrolled | Study groups                        | Intervention                                                                           | Status                                       |
|-------------|---------------------------------------------------------------------------------------------------------------------------------------------------------------------------------------------------------------------------------------------------------------------------------------|------------------------------------|------------|-----------------------------------------------------------------------------------------------------|-------------------------|-----------------|--------------|-------------|-----------------------|-------------------------------------|----------------------------------------------------------------------------------------|----------------------------------------------|
| NCT03222453 | Thalassemia Treatment Based on the Stem Cell Technology                                                                                                                                                                                                                               | hiPSC                              | autologous | Beta-Thalassemia                                                                                    | Hematologic disorder    | China           | Open Label   | N.A.        | 2                     | Intervention/ No Intervention       | Injection of hematopoietic stem cells                                                  | Results submitted to ClinicalTrials.gov      |
| NCT01674829 | A Phase I/IIa, Open-Label, Single-Center, Prospective Study to Determine the Safety and Tolerability of Sub-retinal Transplantation of Human Embryonic Stem Cell Derived Retinal Pigmented Epithelial(MA09-hRPE) Cells in Patients With Advanced Dry Age-related Macular Degeneration | hESC-derived RPE; MA09-hRPE        | allogeneic | Dry Age Related Macular Degeneration                                                                | Sense organ diseases    | South Korea     | Open Label   | Phase I/IIa | 12                    | 4 groups, different number of cells | Sub-retinal Transplantation                                                            | Active, not recruiting                       |
| NCT02903576 | Stem Cell Therapy for Outer Retinal Degenerations                                                                                                                                                                                                                                     | hESC-derived RPE                   | allogeneic | Age Related Macular Degeneration, Stargardt's Disease or Exudative Age-related Macular Degeneration | Sense organ diseases    | Brazil          | Open Label   | Phase I/II  | 18                    | 2 active comparators                | Injection of hESC-RPE in suspension versus injection of hESC-RPE seeded in a substrate | Not yet reported, recruitment status unknown |
| NCT01625559 | Safety and Tolerability of MA09-hRPE Cells in Patients With Stargardt's Macular Dystrophy(SMD)                                                                                                                                                                                        | hESC-derived RPE cells (MA09-hRPE) | allogeneic | Stargardt's Macular Dystrophy                                                                       | Sense organ diseases    | South Korea     | Open Label   | Phase I     | 3                     | Single arm                          | Sub-retinal transplantation                                                            | Not yet reported, recruitment status unknown |
| NCT03763136 | Treating Heart Failure With hPSC-CMs                                                                                                                                                                                                                                                  | hiPSCs-derived cardiomy            | allogeneic | Heart Failure                                                                                       | Cardiovascular diseases | China           | Open Label   | NA          | 5                     | Single arm                          | Injection into the myocardium                                                          | Recruiting                                   |

|             |                                                                                                                                                                  |                                     |            |                                      |                        |        |            |             |    |                                                                       |                                      |            |
|-------------|------------------------------------------------------------------------------------------------------------------------------------------------------------------|-------------------------------------|------------|--------------------------------------|------------------------|--------|------------|-------------|----|-----------------------------------------------------------------------|--------------------------------------|------------|
|             |                                                                                                                                                                  | ocytes                              |            |                                      |                        |        |            |             |    |                                                                       |                                      |            |
| NCT03046407 | Treatment of Dry Age Related Macular Degeneration Disease With Retinal Pigment Epithelium Derived From Human Embryonic Stem Cells                                | hESC-derived RPE                    | allogeneic | Dry Age-related Macular Degeneration | Sense organ diseases   | China  | Open Label | Phase I/II  | 10 | Single arm                                                            | Subretinal transplantation           | Recruiting |
| NCT03944239 | Safety and Efficacy of Subretinal Transplantation of Clinical Human Embryonic Stem Cell Derived Retinal Pigment Epitheliums in Treatment of Retinitis Pigmentosa | hESC-derived RPE                    | allogeneic | Retinitis pigmentosa                 | Sense organ diseases   | China  | Open Label | Phase I     | 10 | Single arm                                                            | Subretinal transplantation           | Recruiting |
| NCT03482050 | Study to Evaluate Transplantation of Astrocytes Derived From Human Embryonic Stem Cells, in Patients With Amyotrophic Lateral Sclerosis                          | hESC-derived astrocytes             | allogeneic | Amyotrophic Lateral Sclerosis        | Neurological disorders | Israel | Open Label | Phase I/IIa | 21 | Dose-escalation, 4 groups                                             | intrathecal (spinal) injection       | Recruiting |
| NCT02755428 | Subretinal Transplantation of Retinal Pigment Epitheliums in Treatment of Age-related Macular Degeneration Diseases                                              | hESC-derived RPE                    | allogeneic | Dry Age-related Macular Degeneration | Sense organ diseases   | China  | Open Label | Phase I/II  | 10 | Single arm                                                            | Subretinal transplantation           | Recruiting |
| NCT03119636 | Safety and Efficacy Study of Human ESC-derived Neural Precursor Cells in the Treatment of Parkinson's Disease                                                    | hESC-derived neural precursor cells | allogeneic | Parkinson's disease                  | Neurological disorders | China  | Open Label | Phase I/II  | 50 | 3 groups: Levodopa 1) +NPC 2) + HLA-matched NPC, 3) + HLA-non-matched | Stereotaxic intra-striatal injection | Recruiting |

|                    |                                                                                                                          |                                           |            |                                                |                         |             |            |             |    | NPC                                                                                                                     |                                                                                   |                            |
|--------------------|--------------------------------------------------------------------------------------------------------------------------|-------------------------------------------|------------|------------------------------------------------|-------------------------|-------------|------------|-------------|----|-------------------------------------------------------------------------------------------------------------------------|-----------------------------------------------------------------------------------|----------------------------|
| NCT02286089        | Safety and Efficacy Study of OpRegen for Treatment of Advanced Dry-Form Age-Related Macular Degeneration                 | hESC-derived RPE                          | allogeneic | Age-related Macular Degeneration               | Sense organ diseases    | USA+Israel  | Open Label | Phase I/IIa | 24 | Dose-escalation, 4 groups                                                                                               | Subretinal transplantation                                                        | Recruiting                 |
| NCT03877471        | Mesenchymal Stem Cells - Like Cell Transplantation in Women With Primary Ovarian Insufficiency                           | hESC-derived MSC-like cells               | allogeneic | Primary Ovarian Insufficiency                  | Reproductive diseases   | China       | Open Label | Phase I     | 28 | 3 groups: low, medium and high dosage of cells                                                                          | Injection into ovaries bilaterally                                                | Recruiting                 |
| NCT03841110        | FT500 as Monotherapy and in Combination With Immune Checkpoint Inhibitors in Subjects With Advanced Solid Tumors         | iPSC-derived NK cell cancer immunotherapy | allogeneic | advanced solid tumors                          | Neoplasms               | USA         | Open Label | Phase I     | 76 | 1) FT500 Monotherapy, 2) FT500 in Combination with Immune Checkpoint Inhibitor nivolumab, pembrolizumab or atezolizumab |                                                                                   | Recruiting                 |
| JPRN-UMIN000032989 | Clinical trial of human (allogeneic) induced pluripotent stem cell-derived cardiomyocyte sheet for severe cardiomyopathy | iPS cell-derived cardiomyocytes           | allogeneic | Ischemic cardiomyopathy                        | Cardiovascular diseases | Japan       | Open Label | Phase I, II | 3  | Single arm                                                                                                              | iPS cell-derived cardiomyocyte sheet transplantation                              | Recruitment complete       |
| NCT03963154        | Interventional Study of Implantation of hESC-derived RPE in Patients With RP Due to Monogenic Mutation                   | hESC-derived RPE                          | allogeneic | Retinitis Pigmentosa Due to Monogenic Mutation | Sense organ diseases    | France      | Open Label | Phase I/II  | 12 | 2 sequential cohorts: 1) very advanced and 2) less advanced loss of visual acuity                                       | single central subretinal implantation of a hESC-derived RPE monolayer in one eye | Recruiting                 |
| NCT03305029        | The Safety and Tolerability of Sub-retinal Transplantation of SCNT-hES-RPE                                               | SCNT hESC-derived RPE                     | allogeneic | Dry Age-Related Macular Degeneration           | Sense organ diseases    | South Korea | Open-Label | Phase I     | 3  | Single arm                                                                                                              | Subretinal transplantation                                                        | Recruitment status unknown |

|                    |                                                                                                                                                                                                |                                       |            |                                            |                         |        |                          |            |    |                                                                              |                                                            |                                             |
|--------------------|------------------------------------------------------------------------------------------------------------------------------------------------------------------------------------------------|---------------------------------------|------------|--------------------------------------------|-------------------------|--------|--------------------------|------------|----|------------------------------------------------------------------------------|------------------------------------------------------------|---------------------------------------------|
|                    | Cells in Patients with Advanced Dry AMD                                                                                                                                                        |                                       |            |                                            |                         |        |                          |            |    |                                                                              |                                                            |                                             |
| NCT02057900        | Transplantation of Human Embryonic Stem Cell-derived Progenitors in Severe Heart Failure (ESCORT)                                                                                              | hESC-derived CD15+ Isl-1+ progenitors | allogeneic | Ischemic Heart Disease                     | Cardiovascular diseases | France | Open-Label               | Phase I    | 10 | Single arm                                                                   | fibrin gel embedding hESC-derived CD15+ Isl-1+ progenitors | Completed, results published <sup>1</sup>   |
| NCT01469832        | Safety and Tolerability of Sub-retinal Transplantation of Human Embryonic Stem Cell Derived Retinal Pigmented Epithelial (hESC-RPE) Cells in Patients with Stargardt's Macular Dystrophy (SMD) | hESC-derived RPE cells (MA09-hRPE)    | allogeneic | Stargardt's Macular Dystrophy              | Sense organ diseases    | UK     | Open-Label, Multi-Center | Phase I/II | 12 | Dose-escalation; 5 cohorts - 4 low vision cohorts and 1 better vision cohort | Subretinal injection                                       | Completed, results published <sup>2</sup>   |
| NCT01345006        | Sub-retinal Transplantation of hESC Derived RPE(MA09-hRPE)Cells in Patients With Stargardt's Macular Dystrophy                                                                                 | hESC-derived RPE cells (MA09-hRPE)    | allogeneic | Stargardt's Macular Dystrophy              | Sense organ diseases    | USA    | Open-Label, Multi-Center | Phase I/II | 13 | Dose-escalation; 5 cohorts - 4 low vision cohorts and 1 better vision cohort | Subretinal injection                                       | Completed, results published <sup>3,4</sup> |
| NCT01344993        | Safety and Tolerability of Sub-retinal Transplantation of hESC Derived RPE (MA09-hRPE) Cells in Patients With Advanced Dry Age Related Macular Degeneration                                    | hESC-derived RPE cells (MA09-hRPE)    | allogeneic | Dry Age-Related Macular Degeneration       | Sense organ diseases    | USA    | Open-Label, Multi-Center | Phase I/II | 13 | Dose-escalation; 5 cohorts - 4 low vision cohorts and 1 better vision cohort | Subretinal injection                                       | Completed, results published <sup>3,4</sup> |
| JPRN-UMIN000011929 | A Study of transplantation of autologous induced pluripotent stem cell (iPSC) derived retinal pigment epithelium                                                                               | hiPSC-derived RPE                     | autologous | Exudative age-related macular degeneration | Sense organ diseases    | Japan  | Open Label               |            | 6  | Single arm                                                                   | Transplantation of iPSC-derived RPE cell sheet             | Complete, results published <sup>5</sup>    |



|                    |                                                                                                                                                         |                                        |            |                                                    |                           |                |            |             |    |                                      |                                                                    |                            |
|--------------------|---------------------------------------------------------------------------------------------------------------------------------------------------------|----------------------------------------|------------|----------------------------------------------------|---------------------------|----------------|------------|-------------|----|--------------------------------------|--------------------------------------------------------------------|----------------------------|
|                    | (RPE) cell sheet in subjects with exudative age related macular degeneration                                                                            |                                        |            |                                                    |                           |                |            |             |    |                                      |                                                                    |                            |
| NCT02590692        | Study of Subretinal Implantation of Human Embryonic Stem Cell-Derived RPE Cells in Advanced Dry AMD                                                     | hESC-derived RPE                       | allogeneic | Dry Age-Related Macular Degeneration               | Sense organ diseases      | USA            | Open Label | Phase I/IIa | 16 | Treated eye and non-treated eye      | Subretinal implantation                                            | Active, not recruiting     |
| NCT03839238        | Safety Observation on hESC Derived MSC Like Cell for the Meniscus Injury                                                                                | hESC-derived MSC like cell             | allogeneic | Meniscus injury                                    | Musculoskeletal disorders | China          | Open Label | Phase I     | 18 | Three cohorts with different dosages | hESC-derived MSC like cells                                        | Active, not recruiting     |
| NCT02923375        | A Study of CYP-001 for the Treatment of Steroid-Resistant Acute Graft Versus Host Disease                                                               | iPSC-derived MSCs                      | allogeneic | Graft vs Host Disease                              | Immune System             | Australia + UK | Open Label | Phase I     | 16 | Dose escalation, 2 groups            | IV infusion on two occasions                                       | Active, not recruiting     |
| NCT01691261        | A Study Of Implantation Of Retinal Pigment Epithelium In Subjects With Acute Wet Age Related Macular Degeneration                                       | hESC-derived RPE                       | allogeneic | Age-Related Macular Degeneration                   | Sense organ diseases      | UK             | Open Label | Phase I     | 2  | Single arm                           | Implantation of RPE monolayer immobilized on a polyester membrane. | Active, not recruiting     |
| NCT02749734        | Clinical Study of Subretinal Transplantation of Human Embryo Stem Cell Derived Retinal Pigment Epithelium in Treatment of Macular Degeneration Diseases | hESC-derived RPE                       | allogeneic | Macular Degeneration Stargardt's Macular Dystrophy | Sense organ diseases      | China          | Open label | Phase I/II  | 15 | Single arm                           | Subretinal transplantation                                         | Recruitment status unknown |
| JPRN-UMIN000033564 | Kyoto Trial to Evaluate the Safety and Efficacy of iPSC-derived dopaminergic progenitors in the treatment of                                            | hiPSC-derived dopaminergic progenitors |            | Parkinson's Disease                                | Sense organ diseases      | Japan          | Open Label | Phase I/II  | 7  | Single arm                           | Transplantation into the corpus striatum                           | Recruitment suspended      |

|                     |                                                                                                                                                                                                      |                               |            |                                              |                      |       |            |  |    |                    |                                              |                                            |
|---------------------|------------------------------------------------------------------------------------------------------------------------------------------------------------------------------------------------------|-------------------------------|------------|----------------------------------------------|----------------------|-------|------------|--|----|--------------------|----------------------------------------------|--------------------------------------------|
|                     | Parkinson's Disease                                                                                                                                                                                  |                               |            |                                              |                      |       |            |  |    |                    |                                              |                                            |
| JPRN-UMIN000026003  | A Study of transplantation of allogeneic induced pluripotent stem cell (iPSC) derived retinal pigment epithelium (RPE) cell suspension in subjects with neovascular age related macular degeneration | iPSC-derived RPE              | allogeneic | Neovascular age related macular degeneration | Sense organ diseases | Japan | Open Label |  | 5  | Single arm         | Subretinal transplantation                   | Recruitment complete; follow-up continuing |
| ChiCTR-OCB-15007054 | Clinical study of subretinal transplantation of clinical human embryonic stem cells derived retinal pigment epitheliums in treatment of dry age-related macular degeneration diseases                | hESC-derived RPE              | allogeneic | Dry age-related macular degeneration         | Sense organ diseases | China | Open Label |  | 10 | Single arm         | Subretinal transplantation                   | Recruiting                                 |
| ChiCTR-OCB-15005968 | The clinical trial of human embryonic stem cell derived epithelial cells transplantation in the treatment of severe ocular surface diseases                                                          | hESC-derived epithelial cells | allogeneic | Severe Ocular Surface Disease                | Sense organ diseases | China | Open Label |  | 20 | Historical control | Corneal-epithelium-like-cell transplantation | Recruiting                                 |

**Supplementary Table 2. Characteristics of all interventional studies.** Abbreviations: hESC = human embryonic stem cells, hiPSC = human induced pluripotent stem cell, RPE = retinal pigment epithelium, hRPE = human retinal pigment epithelium, MSC = mesenchymal stem cell, UK = United Kingdom

## Supplementary References

1. Menasché, P., *et al.* Transplantation of Human Embryonic Stem Cell-Derived Cardiovascular Progenitors for Severe Ischemic Left Ventricular Dysfunction. *Journal of the American College of Cardiology* **71**, 429-438 (2018).
2. Mehat, M.S., *et al.* Transplantation of Human Embryonic Stem Cell-Derived Retinal Pigment Epithelial Cells in Macular Degeneration. *Ophthalmology* **125**, 1765-1775 (2018).
3. Schwartz, S.D., *et al.* Embryonic stem cell trials for macular degeneration: a preliminary report. *Lancet (London, England)* **379**, 713-720 (2012).
4. Schwartz, S.D., *et al.* Human embryonic stem cell-derived retinal pigment epithelium in patients with age-related macular degeneration and Stargardt's macular dystrophy: follow-up of two open-label phase 1/2 studies. *Lancet (London, England)* **385**, 509-516 (2015).
5. Mandai, M., *et al.* Autologous Induced Stem-Cell-Derived Retinal Cells for Macular Degeneration. *The New England journal of medicine* **376**, 1038-1046 (2017).
